# Supplementary material for: Bio-based unsaturated polyester resin from post-consumer PET
Source: Royal Society of Chemistry journal article supplement (doi:10.1039/d3ra08500g), 2024-01-01
Supplement: d3ra08500g1.pdf [file d3ra08500g1.pdf]

Supporting Information for:

## **Bio-based Unsaturated Polyester Resin from Post-Consumer PET.**

David Rubeš,<sup>a</sup> Jaromír Vinklár, <sup>b</sup> Štěpán Podzimek,<sup>a</sup> and Jan Honzíček<sup>b,\*</sup>

<sup>a</sup> Institute of Chemistry and Technology of Macromolecular Materials, Faculty of Chemical Technology, University of Pardubice, Studentská 573, 532 10 Pardubice, Czech Republic

<sup>b</sup> Department of General and Inorganic Chemistry, Faculty of Chemical Technology, University of Pardubice, Studentská 573, 532 10 Pardubice, Czech Republic

- P.2 **Figure S1.** SEC chromatogram of GL1.
- P.2 **Figure S2.** SEC chromatogram of GL2.
- P.2 **Figure S3.** SEC chromatogram of GL3.
- P.3 **Figure S4.** SEC chromatogram of UPET1
- P.3 **Figure S5.** SEC chromatogram of UPET2
- P.4 **Figure S6.** SEC chromatogram of UPET3
- P.4 **Table S1.** Composition of PET glycolysis products.
- P.4 **Table S2.** Composition of synthesized UPs.
- P.5 **Figure S7.** Tensile properties of cured polyester formulations.
- P.5 **Figure S8.** Properties of UPET1/3-DMI40 blends.
- P.6 **Figure S9.** Testing specimen dimensions
- P.6 **Table S3.** Biobased and recycled contents

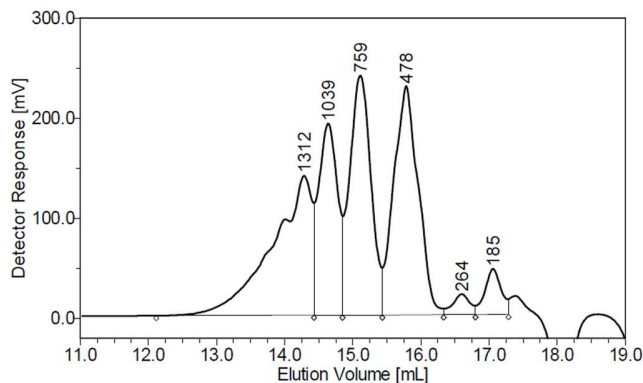

|   | MP (Daltons) | Area    | % Area | Height | Retention Time (min) |
|---|--------------|---------|--------|--------|----------------------|
| 1 | 1312         | 5610094 | 26.2   | 139409 | 14.286               |
| 2 | 1039         | 3715384 | 17.3   | 191476 | 14.639               |
| 3 | 759          | 5250889 | 24.5   | 239247 | 15.111               |
| 4 | 478          | 5739812 | 26.8   | 228687 | 15.783               |
| 5 | 264          | 360054  | 1.7    | 20673  | 16.599               |
| 6 | 185          | 757020  | 3.5    | 45675  | 17.057               |

**Figure S1.** SEC chromatogram of GL1.

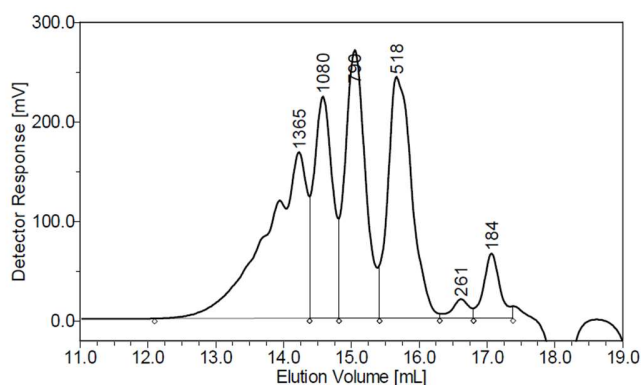

|   | MP (Daltons) | Area    | % Area | Height | Retention Time (min) |
|---|--------------|---------|--------|--------|----------------------|
| 1 | 1365         | 7023270 | 28.9   | 166813 | 14.227               |
| 2 | 1080         | 4268843 | 17.6   | 222684 | 14.580               |
| 3 | 790          | 5651402 | 23.3   | 269390 | 15.050               |
| 4 | 518          | 5911522 | 24.4   | 242389 | 15.667               |
| 5 | 261          | 330711  | 1.4    | 19174  | 16.615               |
| 6 | 184          | 1076396 | 4.4    | 64821  | 17.065               |

**Figure S2.** SEC chromatogram of GL2.

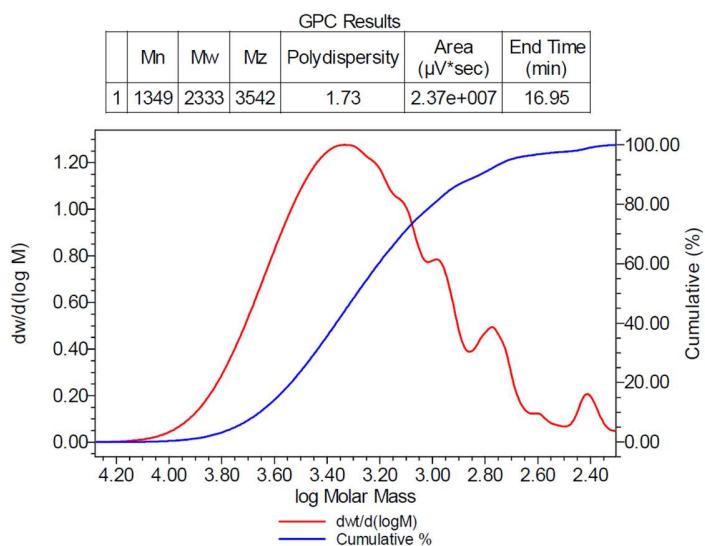

**Figure S3.** SEC chromatogram of GL3.

| GPC Results |      |      |      |      |       |                |                                    |                |
|-------------|------|------|------|------|-------|----------------|------------------------------------|----------------|
|             | Mn   | Mw   | MP   | Mz   | Mz+1  | Polydispersity | Area ( $\mu\text{V}^2\text{sec}$ ) | End Time (min) |
| 1           | 2153 | 4762 | 3866 | 8668 | 13727 | 2.21           | 2.42e+007                          | 18.28          |

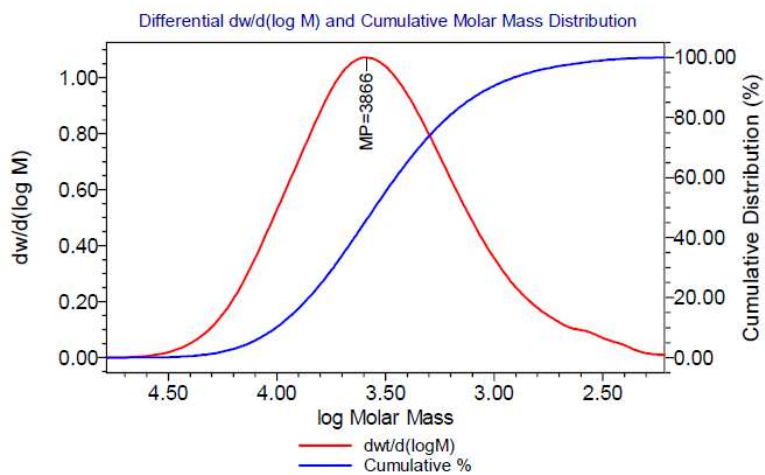

Figure S4. SEC chromatogram of UPET1.

| GPC Results |      |      |      |      |       |                |                                    |                |
|-------------|------|------|------|------|-------|----------------|------------------------------------|----------------|
|             | Mn   | Mw   | MP   | Mz   | Mz+1  | Polydispersity | Area ( $\mu\text{V}^2\text{sec}$ ) | End Time (min) |
| 1           | 2134 | 4332 | 3541 | 8021 | 14435 | 2.03           | 2.25e+007                          | 18.07          |

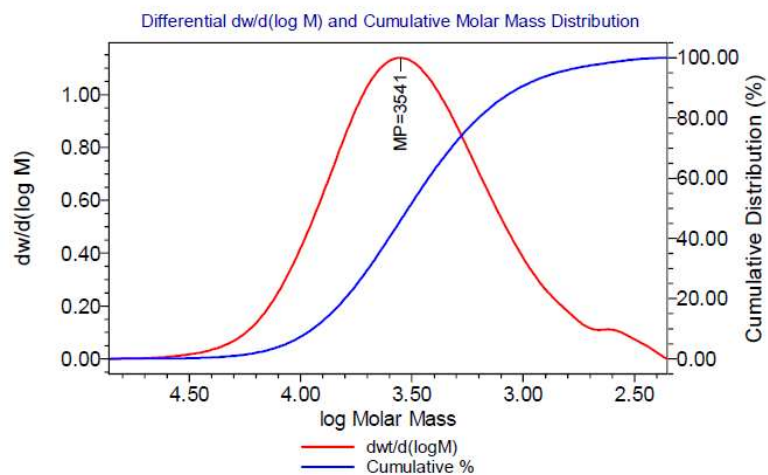

Figure S5. SEC chromatogram of UPET2.

GPC Results

|   | Mn   | Mw   | MP   | Mz    | Mz+1  | Polydispersity | Area<br>( $\mu\text{V}^2\text{sec}$ ) | End Time<br>(min) |
|---|------|------|------|-------|-------|----------------|---------------------------------------|-------------------|
| 1 | 2805 | 6794 | 5162 | 13367 | 22926 | 2.42           | 2.34e+007                             | 18.08             |

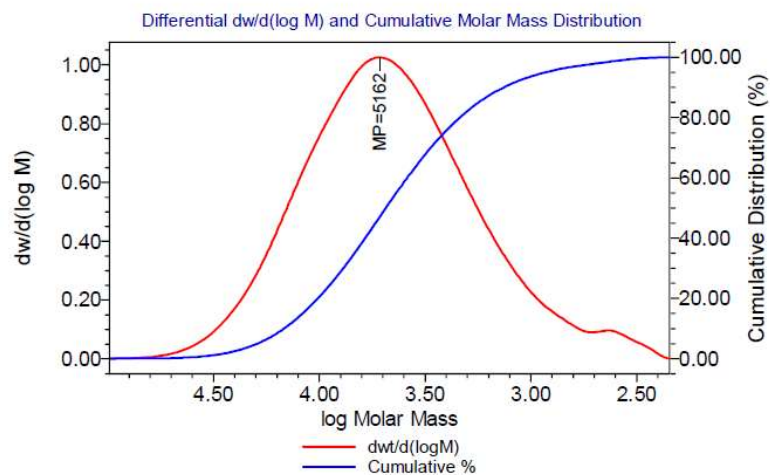

**Figure S6.** SEC chromatogram of UPET3.

**Table S1.** Composition of PET glycolysis products.

| Glycolysate | Feed composition <sup>a</sup> | Theoretical segment distribution <sup>b,c</sup> | Experimental segment distribution <sup>b,d</sup> |
|-------------|-------------------------------|-------------------------------------------------|--------------------------------------------------|
| GL1         | 1/1/1                         | 1/1/2/2/1/1                                     | 0.77/1.12/2.13/2.08/0.95/0.94                    |
| GL2         | 1/0.5/1.5                     | 0.33/1/0.66/2/0.33/1                            | 0.33/0.92/0.85/1.88/0.44/0.90                    |
| GL3         | 1/0/2                         | 0/1/0/2/0/1                                     | 0.06/0.67/0.13/2.73/0.00/0.42                    |

<sup>a</sup> Molar ratio of the building blocks TPA/EG/DEG. <sup>b</sup> Molar ratio of TPA-EG-TPA/TPA-DEG-TPA/TPA-EG-OH/TPA-DEG-OH/EG/DEG segments given in Scheme 1. <sup>c</sup> Based on the statistical distribution of equally reactive hydroxyl groups. <sup>d</sup> Determined by <sup>1</sup>H NMR spectroscopy.

**Table S2.** Composition of synthesized UPs.

| Polyester | Feed composition (molar ratio) <sup>a</sup> | Polyester composition (molar ratio) <sup>b</sup> |
|-----------|---------------------------------------------|--------------------------------------------------|
| UPET1     | 1/1/1/1                                     | 0.99/1.00/0.80/1.24/0.04/0.06                    |
| UPET2     | 1/1/0.5/1.5                                 | 0.99/1.00/0.42/1.57/0.04/0.05                    |
| UPET3     | 1/1/0/2                                     | 0.71/1.00/0.14/1.45 <sup>c</sup> /0.04/0.05      |

<sup>a</sup> Feed composition IA/TPA/EG/DEG. <sup>b</sup> Molar ratio of the IA/TPA/EG/DEG/MES/OA segments determined by <sup>1</sup>H NMR spectroscopy. <sup>c</sup> Covers higher oligomers of EG.

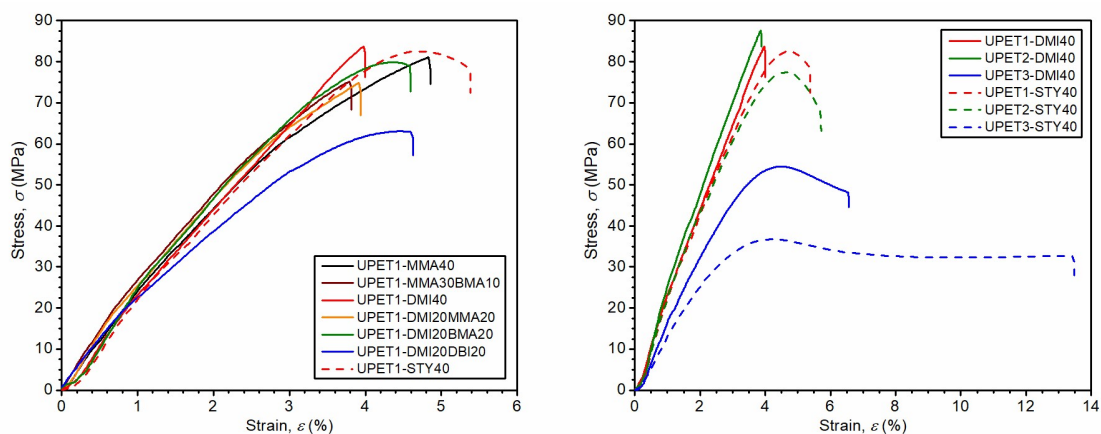

**Figure S7.** Tensile properties of cured polyester formulations.

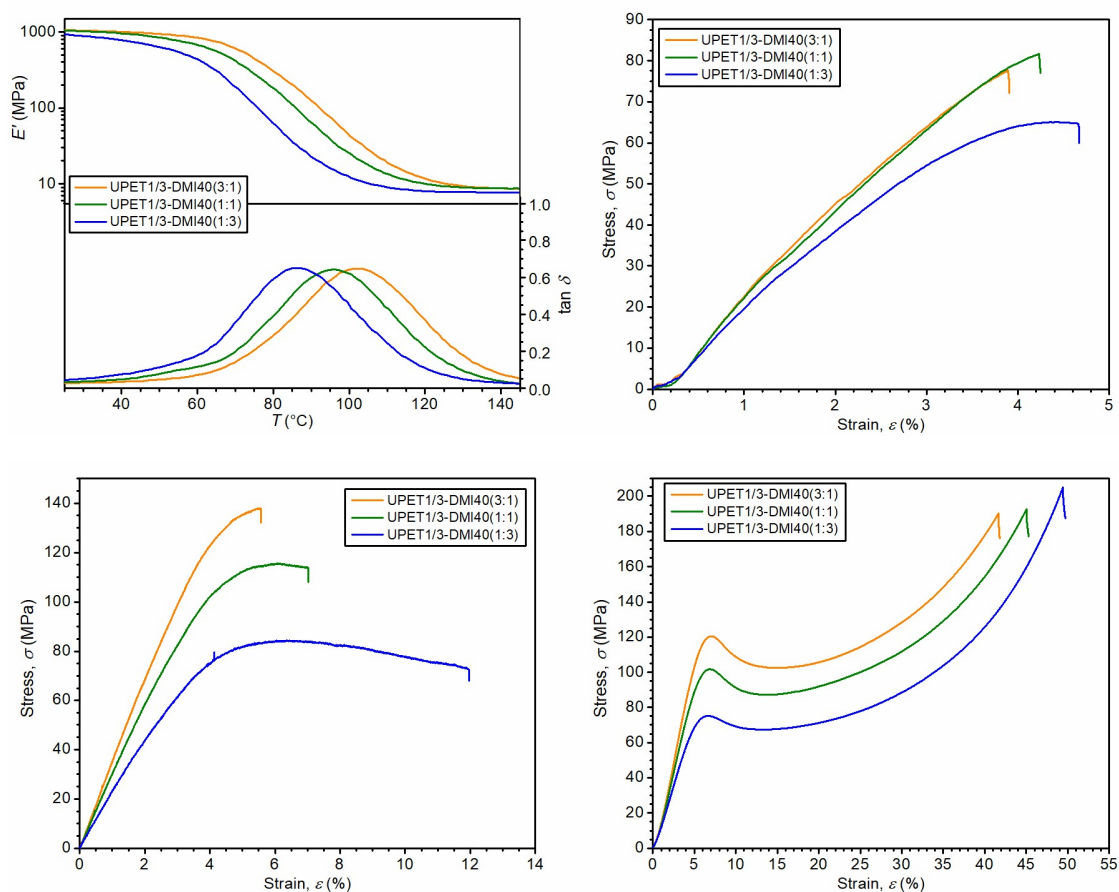

**Figure S8.** Properties of UPET1/3-DMI40 blends: DMA analysis (top left), tensile (top right), flexure (bottom left) and compression measurements (bottom right).

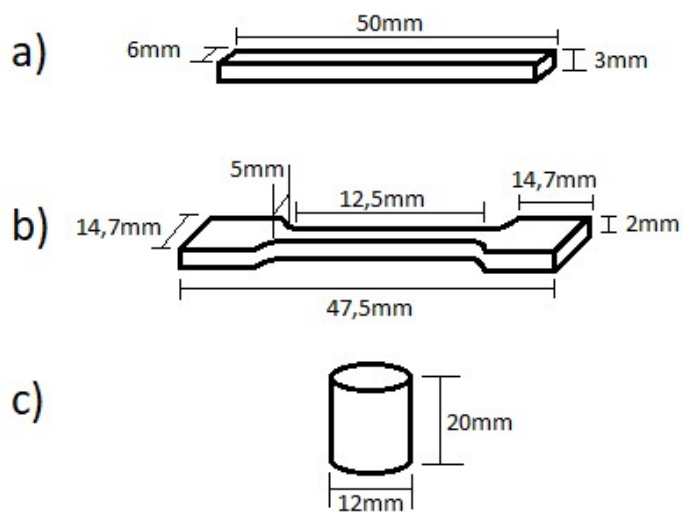

**Table S3.** Bio-based and recycled contents in UP prepolymer and formulations of UP resins.<sup>a</sup>

|                    | UP       |          | UP resin |          |
|--------------------|----------|----------|----------|----------|
|                    | Biobased | Recycled | Biobased | Recycled |
| UPET1-MMA40        | 51.0     | 49.0     | 43.0     | 29.4     |
| UPET1-MMA30BMA10   | 51.0     | 49.0     | 45.1     | 29.4     |
| UPET1-DMI40        | 51.0     | 49.0     | 70.6     | 29.4     |
| UPET1-DMI20MMA20   | 51.0     | 49.0     | 56.8     | 29.4     |
| UPET1-DMI20BMA20   | 51.0     | 49.0     | 60.9     | 29.4     |
| UPET1-DMI20DBI20   | 51.0     | 49.0     | 70.6     | 29.4     |
| UPET1-STY40        | 51.0     | 49.0     | 30.6     | 29.4     |
| UPET2-DMI40        | 60.9     | 39.1     | 76.5     | 23.5     |
| UPET2-STY40        | 60.9     | 39.1     | 36.5     | 23.5     |
| UPET3-DMI40        | 69.7     | 30.3     | 81.8     | 18.2     |
| UPET3-STY40        | 69.7     | 30.3     | 41.8     | 18.2     |
| UPET1/3-DMI40(3:1) | 55.7     | 44.3     | 73.4     | 26.6     |
| UPET1/3-DMI40(1:1) | 60.4     | 39.6     | 76.2     | 23.8     |
| UPET1/3-DMI40(1:3) | 65.1     | 34.9     | 79.0     | 21.0     |

<sup>a</sup> Given in wt.%.
